# Supplementary material for: Change in skeletal muscle stiffness after running competition is dependent on both running distance and recovery time: a pilot study
Source: PeerJ. 2018 Mar 12;6:e4469. doi: 10.7717/peerj.4469 (PMC5853607; doi:10.7717/peerj.4469)
Supplement: Supplemental Information 2 [file peerj-06-4469-s002.xlsx]

## Sheet: Sheet1
Shear wave speed(m/s) before, after one day (after 1) and after one week (after 2) for medium distance running on both leg (left and right)
soleus muscle								MG										LG											BF									ST									RF
subject 15-before-right	3.65		subject 15-after1-right	2.17		subject 15-after2-right	2.54		subject 15-before-right	2.57		subject 15-after1-right	2.95		subject 15-after2-right	2.33		subject 15-before-right	3.17		subject 15-after1-right	2.71		subject 15-after2-right	2.84		subject 15-before-right	2.75		subject 15-after1-right	2.24		subject 15-after2-right	1.91		subject 15-before-right	3.36		subject 15-after1-right	2.48		subject 15-after2-right	2.69			subject 15-before-right	4.1		subject 15-after1-right
subject 15-before-left	4.52		subject 15-after1-left	1.98		subject 15-after2-left	3.33		subject 15-before-left	2.62		subject 15-after1-left	2.51		subject 15-after2-left	2.7		subject 15-before-left	2.96		subject 15-after1-left	2.29		subject 15-after2-left	2.63		subject 15-before-left	2.31		subject 15-after1-left	1.87		subject 15-after2-left	1.86		subject 15-before-left	2.97		subject 15-after1-left	2.98		subject 15-after2-left	2.95			subject 15-before-left	3.57		subject 15-after1-left
subject 16-before-right	3.54		subject 16-after1-right	4.74		subject 16-after2-right	4.43		subject 16-before-right	2.2		subject 16-after1-right	2.31		subject 16-after2-right	2.6		subject 16-before-right	2.39		subject 16-after1-right	2.05		subject 16-after2-right	2.21		subject 16-before-right	2.87		subject 16-after1-right	1.87		subject 16-after2-right	1.88		subject 16-before-right	2.78		subject 16-after1-right	2.35		subject 16-after2-right	2.59			subject 16-before-right	3.8		subject 16-after1-right
subject 16-before-left	2.68		subject 16-after1-left	2.36		subject 16-after2-left	2.18		subject 16-before-left	2.83		subject 16-after1-left	3.03		subject 16-after2-left	2.45		subject 16-before-left	2.67		subject 16-after1-left	3.14		subject 16-after2-left	2.74		subject 16-before-left	1.96		subject 16-after1-left	2.3		subject 16-after2-left	1.96		subject 16-before-left	3.03		subject 16-after1-left	2.91		subject 16-after2-left	2.88			subject 16-before-left	3.46		subject 16-after1-left
subject 17-before-right	3.06		subject 17-after1-right	2.85		subject 17-after2-right	2.53		subject 17-before-right	2.17		subject 17-after1-right	2.01		subject 17-after2-right	2.37		subject 17-before-right	2.06		subject 17-after1-right	2.72		subject 17-after2-right	2.16		subject 17-before-right	1.74		subject 17-after1-right	1.86		subject 17-after2-right	2.52		subject 17-before-right	2.03		subject 17-after1-right	1.81		subject 17-after2-right	1.81			subject 17-before-right	2.47		subject 17-after1-right
subject 17-before-left	2.09		subject 17-after1-left	2.5		subject 17-after2-left	2.11		subject 17-before-left	2.18		subject 17-after1-left	2.06		subject 17-after2-left	1.79		subject 17-before-left	2.45		subject 17-after1-left	2.16		subject 17-after2-left	2.17		subject 17-before-left	2.94		subject 17-after1-left	2.28		subject 17-after2-left	1.75		subject 17-before-left	3.22		subject 17-after1-left	2.2		subject 17-after2-left	1.93			subject 17-before-left	2.4		subject 17-after1-left
subject 18-before-right	2.7		subject 18-after1-right	2.91		subject 18-after2-right	1.77		subject 18-before-right	2.22		subject 18-after1-right	2.07		subject 18-after2-right	2.04		subject 18-before-right	1.77		subject 18-after1-right	1.88		subject 18-after2-right	1.96		subject 18-before-right	2.93		subject 18-after1-right	2.7		subject 18-after2-right	1.34		subject 18-before-right	1.98		subject 18-after1-right	2.27		subject 18-after2-right	1.44			subject 18-before-right	2.88		subject 18-after1-right
subject 18-before-left	3.35		subject 18-after1-left	3.25		subject 18-after2-left	2.28		subject 18-before-left	2.58		subject 18-after1-left	2.55		subject 18-after2-left	1.88		subject 18-before-left	1.79		subject 18-after1-left	2.08		subject 18-after2-left	2.43		subject 18-before-left	1.23		subject 18-after1-left	2.23		subject 18-after2-left	1.65		subject 18-before-left	1.63		subject 18-after1-left	1.64		subject 18-after2-left	1.6			subject 18-before-left	3.13		subject 18-after1-left
subject 19-before-right	4.22		subject 19-after1-right	4.25		subject 19-after2-right	4.23		subject 19-before-right	2.78		subject 19-after1-right	2.55		subject 19-after2-right	2.45		subject 19-before-right	2.22		subject 19-after1-right	2.45		subject 19-after2-right	3.25		subject 19-before-right	2.27		subject 19-after1-right	1.79		subject 19-after2-right	2.17		subject 19-before-right	2.42		subject 19-after1-right	2.52		subject 19-after2-right	2.74			subject 19-before-right	2.93		subject 19-after1-right
subject 19-before-left	3.75		subject 19-after1-left	5.14		subject 19-after2-left	5.14		subject 19-before-left	2.62		subject 19-after1-left	2.31		subject 19-after2-left	2.28		subject 19-before-left	2.82		subject 19-after1-left	2.53		subject 19-after2-left	2.48		subject 19-before-left	3.03		subject 19-after1-left	2.1		subject 19-after2-left	1.69		subject 19-before-left	2.85		subject 19-after1-left	2.62		subject 19-after2-left	1.9			subject 19-before-left	2.51		subject 19-after1-left
subject 20-before-right	3.11		subject 20-after1-right	2.07		subject 20-after2-right	1.62		subject 20-before-right	2.13		subject 20-after1-right	1.59		subject 20-after2-right	2.53		subject 20-before-right	1.87		subject 20-after1-right	1.53		subject 20-after2-right	2.64		subject 20-before-right	2.88		subject 20-after1-right	1.41		subject 20-after2-right	2.83		subject 20-before-right	2.52		subject 20-after1-right	1.42		subject 20-after2-right	1.4			subject 20-before-right	2.26		subject 20-after1-right
subject 20-before-left	2.09		subject 20-after1-left	1.92		subject 20-after2-left	1.94		subject 20-before-left	2.54		subject 20-after1-left	2.02		subject 20-after2-left	2.84		subject 20-before-left	2.43		subject 20-after1-left	1.62		subject 20-after2-left	2.75		subject 20-before-left	1.69		subject 20-after1-left	1.55		subject 20-after2-left	1.35		subject 20-before-left	2.74		subject 20-after1-left	2.1		subject 20-after2-left	1.82			subject 20-before-left	3.36		subject 20-after1-left
subject 21-before-right	2.07		subject 21-after1-right	2.77		subject 21-after2-right	1.91		subject 21-before-right	2.88		subject 21-after1-right	2.58		subject 21-after2-right	3.54		subject 21-before-right	2.45		subject 21-after1-right	2.27		subject 21-after2-right	2.7		subject 21-before-right	1.99		subject 21-after1-right	2.21		subject 21-after2-right	1.84		subject 21-before-right	3.33		subject 21-after1-right	3.3		subject 21-after2-right	3.13			subject 21-before-right	2.69		subject 21-after1-right
subject 21-before-left	3.34		subject 21-after1-left	2.59		subject 21-after2-left	2.38		subject 21-before-left	2.23		subject 21-after1-left	2.7		subject 21-after2-left	2.3		subject 21-before-left	3.77		subject 21-after1-left	2.37		subject 21-after2-left	2.57		subject 21-before-left	2.37		subject 21-after1-left	1.92		subject 21-after2-left	1.93		subject 21-before-left	3		subject 21-after1-left	3.13		subject 21-after2-left	3.32			subject 21-before-left	3.15		subject 21-after1-left
subject 22-before-right	2.15		subject 22-after1-right	2.77		subject 22-after2-right	1.98		subject 22-before-right	2.47		subject 22-after1-right	2.58		subject 22-after2-right	3.02		subject 22-before-right	2.31		subject 22-after1-right	2.27		subject 22-after2-right	2.37		subject 22-before-right	2.06		subject 22-after1-right	2.21		subject 22-after2-right	2.75		subject 22-before-right	3.46		subject 22-after1-right	3.3		subject 22-after2-right	3.02			subject 22-before-right	2.87		subject 22-after1-right
subject 22-before-left	2.23		subject 22-after1-left	1.94		subject 22-after2-left	1.79		subject 22-before-left	2.79		subject 22-after1-left	2.8		subject 22-after2-left	2.46		subject 22-before-left	2.23		subject 22-after1-left	2.62		subject 22-after2-left	2.23		subject 22-before-left	2.4		subject 22-after1-left	2.05		subject 22-after2-left	2.22		subject 22-before-left	4.12		subject 22-after1-left	3.67		subject 22-after2-left	4.09			subject 22-before-left	2.84		subject 22-after1-left
subject 23-before-right	2.64		subject 23-after1-right	2.02		subject 23-after2-right	2.31		subject 23-before-right	2.12		subject 23-after1-right	2.41		subject 23-after2-right	2.88		subject 23-before-right	2.98		subject 23-after1-right	2.62		subject 23-after2-right	1.95		subject 23-before-right	2.47		subject 23-after1-right	1.84		subject 23-after2-right	1.62		subject 23-before-right	2.33		subject 23-after1-right	2.26		subject 23-after2-right	1.64			subject 23-before-right	3.12		subject 23-after1-right
subject 23-before-left	2.27		subject 23-after1-left	2.44		subject 23-after2-left	2.49		subject 23-before-left	2.16		subject 23-after1-left	2.42		subject 23-after2-left	2.6		subject 23-before-left	2.23		subject 23-after1-left	2.13		subject 23-after2-left	2.31		subject 23-before-left	2.51		subject 23-after1-left	3.25		subject 23-after2-left	3.11		subject 23-before-left	2.06		subject 23-after1-left	2.56		subject 23-after2-left	2.06			subject 23-before-left	3.61		subject 23-after1-left
subject 11-before-right	2.39		subject 11-after1-right	2.46		subject 11-after2-right	2.52		subject 11-before-right	2.27		subject 11-after1-right	2.31		subject 11-after2-right	2.3		subject 11-before-right	2.01		subject 11-after1-right	2.23		subject 11-after2-right	2.23		subject 11-before-right	1.99		subject 11-after1-right	1.89		subject 11-after2-right	3.54		subject 11-before-right	3.68		subject 11-after1-right	3.67		subject 11-after2-right	3.6			subject 11-before-right	3.68		subject 11-after1-right
subject 11-before-left	2.59		subject 11-after1-left	2.99		subject 11-after2-left	2.33		subject 11-before-left	2.35		subject 11-after1-left	1.82		subject 11-after2-left	1.85		subject 11-before-left	2.45		subject 11-after1-left	2.35		subject 11-after2-left	2.67		subject 11-before-left	1.64		subject 11-after1-left	1.83		subject 11-after2-left	2.64		subject 11-before-left	3.37		subject 11-after1-left	2.51		subject 11-after2-left	2.75			subject 11-before-left	3.87		subject 11-after1-left
Average	2.922	#DIV/0!	#DIV/0!	2.806	#DIV/0!	#DIV/0!	2.5905	#DIV/0!	#DIV/0!	2.4355	#DIV/0!	#DIV/0!	2.379	#DIV/0!	#DIV/0!	2.4605	#DIV/0!	#DIV/0!	2.4515	#DIV/0!	#DIV/0!	2.301	#DIV/0!	#DIV/0!	2.4645	#DIV/0!	#DIV/0!	2.3015	#DIV/0!	#DIV/0!	2.07	#DIV/0!	#DIV/0!	2.128	#DIV/0!	#DIV/0!	2.844	#DIV/0!	#DIV/0!	2.585	#DIV/0!	#DIV/0!	2.468	#DIV/0!	#DIV/0!	#DIV/0!	3.135	#DIV/0!	#DIV/0!
STD	0.741234	#DIV/0!	#DIV/0!	0.914603	#DIV/0!	#DIV/0!	0.955353	#DIV/0!	#DIV/0!	0.261584	#DIV/0!	#DIV/0!	0.369977	#DIV/0!	#DIV/0!	0.419592			0.499497			0.379444			0.323638			0.509058			0.400999			0.591275	#DIV/0!	#DIV/0!	0.639213	#DIV/0!	#DIV/0!	0.626297	#DIV/0!	#DIV/0!	0.770124	#DIV/0!	#DIV/0!	#DIV/0!	0.532289	#DIV/0!	#DIV/0!
[truncated: 22 more columns]
